# Supplementary material for: A Wearable, Textile-Based Polyacrylate Imprinted Electrochemical Sensor for Cortisol Detection in Sweat
Source: MDPI journal article supplement (doi:10.3390/bios12100854), 2022-10-10
Supplement: s1 [file s1]

# A Wearable, Textile-based Polyacrylate Imprinted Electrochemical Sensor for Cortisol Detection in Sweat

Samuel M. Mugo <sup>1\*</sup>, Weihao Lu <sup>1</sup>, and Scott Robertson <sup>1</sup>

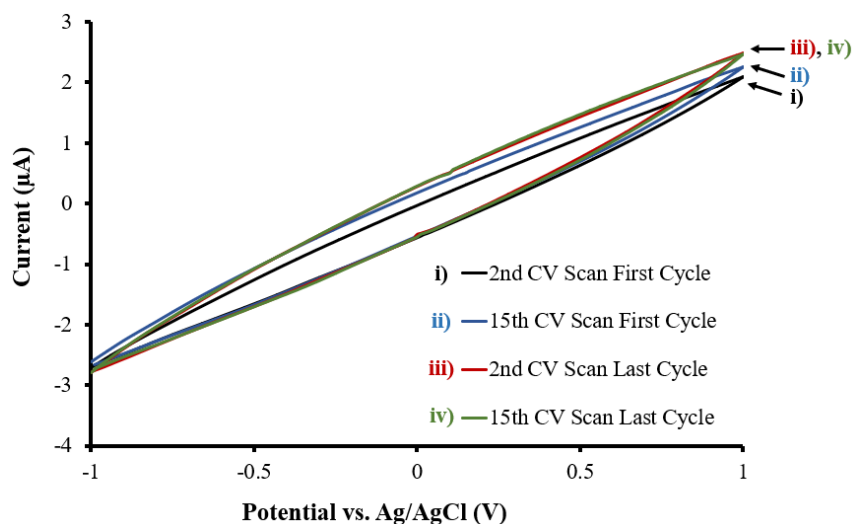

**Figure S1.** Overlaid CVs taken during the i) 2nd scan; and ii) 15th scan of the first electrochemical cleaning cycle; and iii) 2nd; and iv) 15th scan of the last electrochemical cleaning cycle using the MIP@PANI@CNT/CNC@textile cortisol sensor patch.

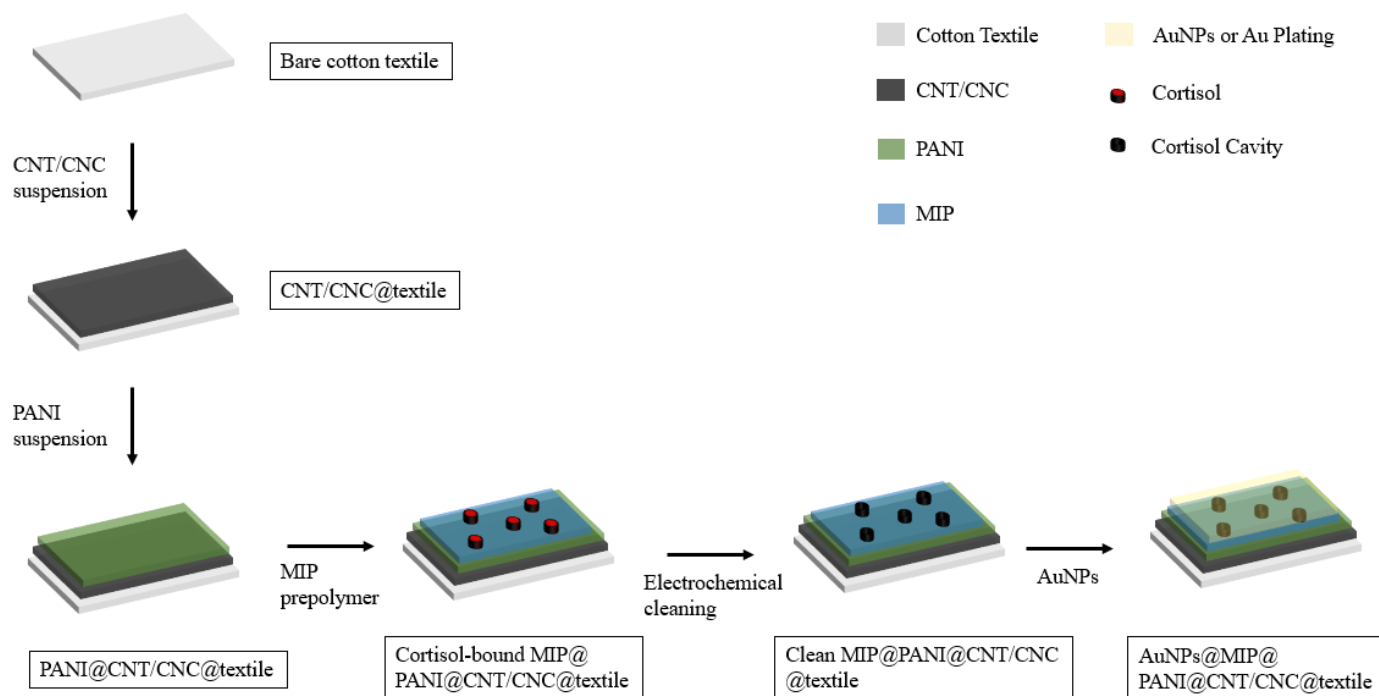

**Figure S2.** Schematic for the LbL assembly of the AuNPs@MIP@PANI@CNT/CNC@textile cortisol sensor patch.

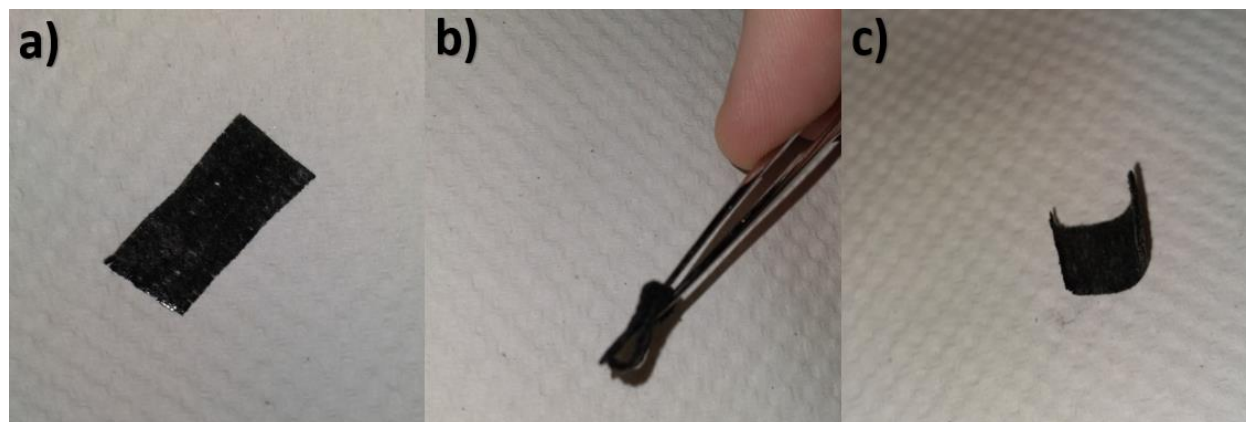

**Figure S3.** Camera image of the AuNPs@MIP@PANI@CNT/CNC@textile taken **a)** before; **b)** during; and **c)** after crumpling with tweezers.

**Figure S4.** EIS circuit fitting for different variations of cortisol sensor patches.

**a)** CNT/CNC@textile

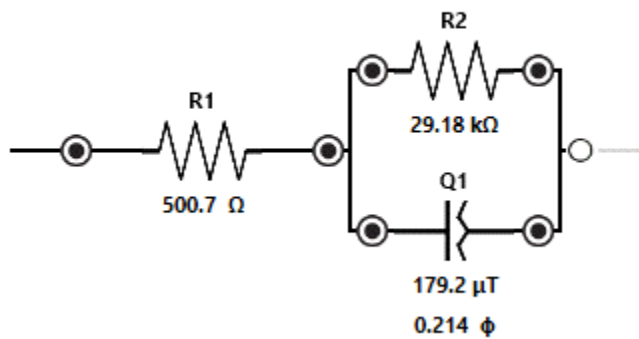

**b)** PANI@CNT/CNC@textile

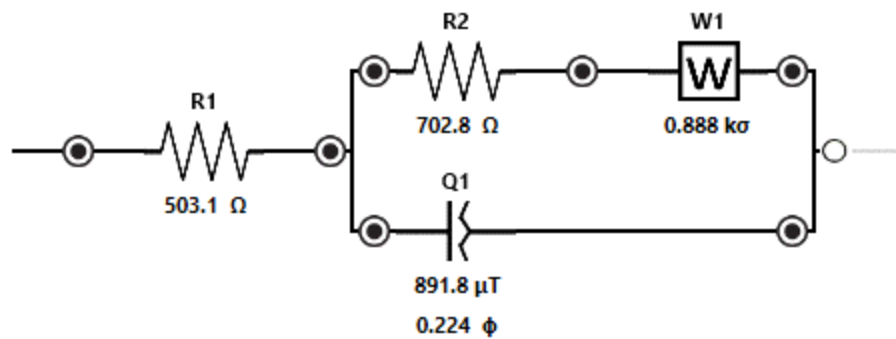

c) MIP@PANI@CNT/CNC@textile

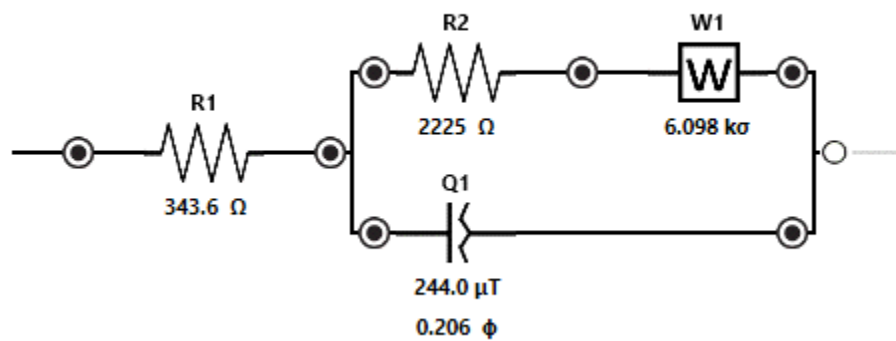

d) NIP@PANI@CNT/CNC@textile

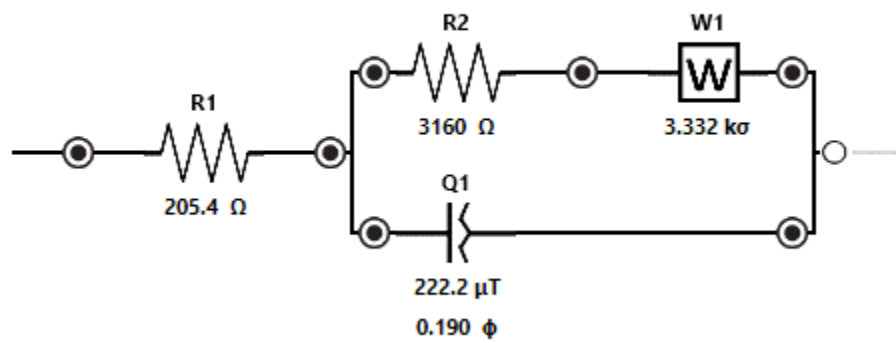

e) AuNPs@MIP@PANI@CNT/CNC@textile

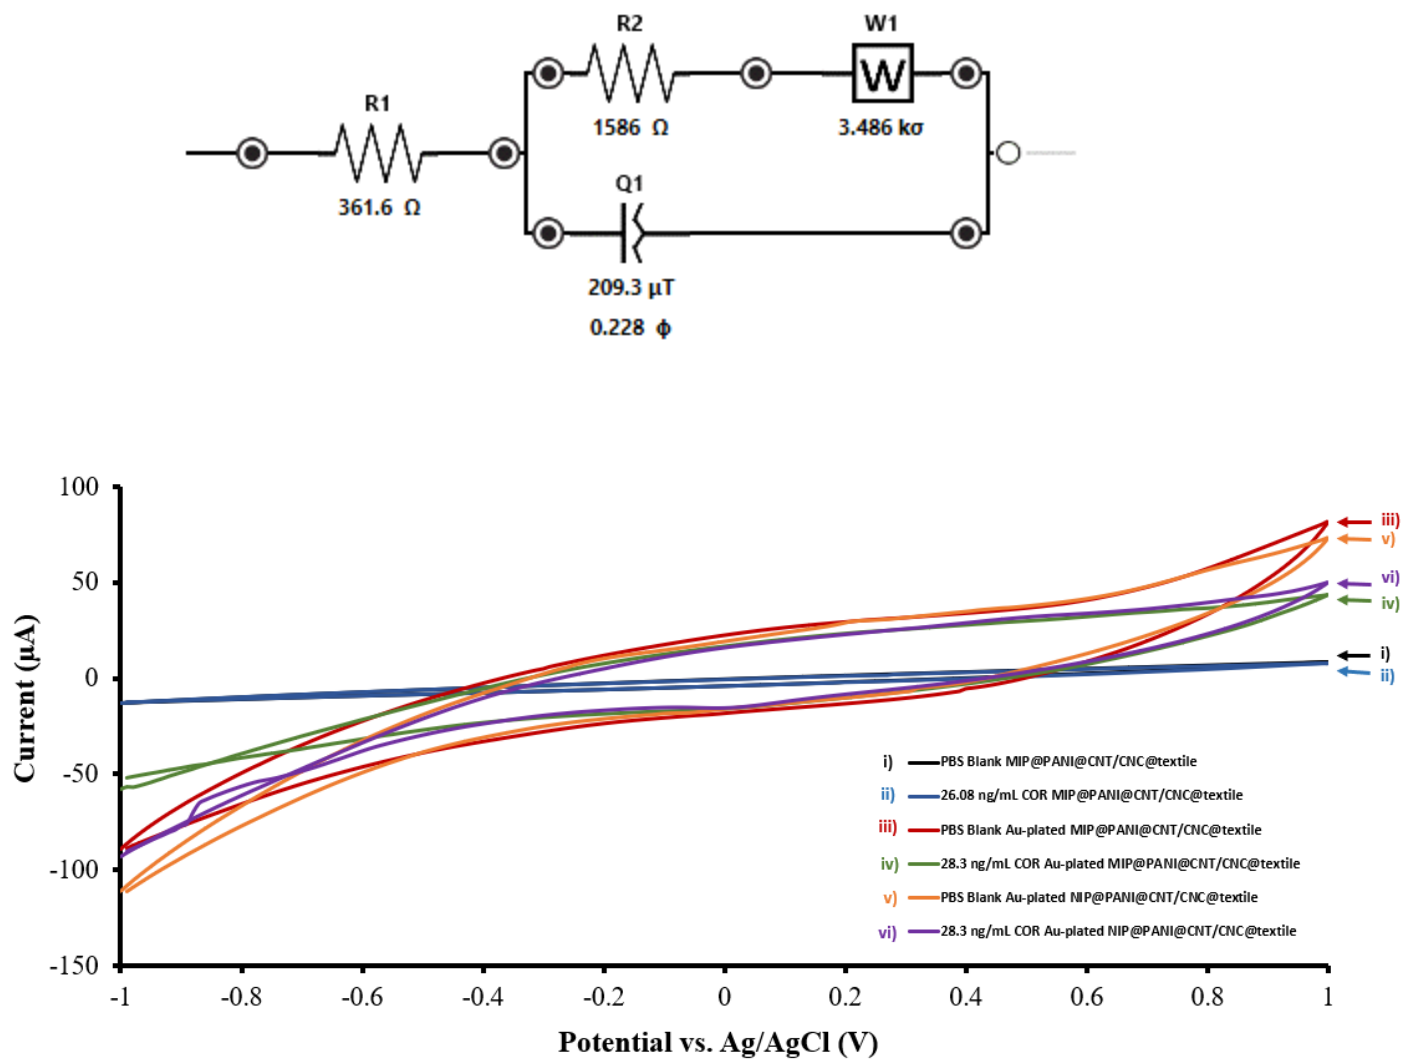

**Figure S5.** Overlaid CVs for different cortisol sensor patch variations obtained from analysis of 0.1 M PBS blank and 26.08 or 28.3 ng/mL cortisol (COR): i), ii) MIP@PANI@CNT/CNC@textile; iii), iv) Au-plated MIP@PANI@CNT/CNC@textile; and v), vi) Au-plated NIP@PANI@CNT/CNC@textile.

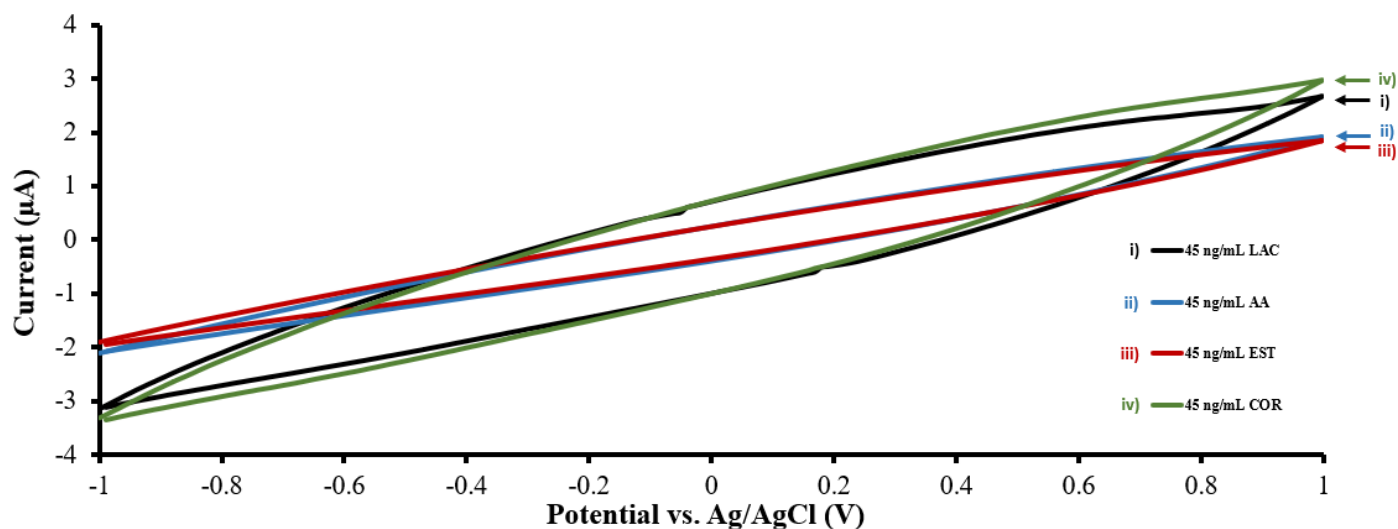

**Figure S6.** Overlaid CVs range obtained from analysis of i) 45 ng/mL lactate (LAC); ii) 45 ng/mL ascorbic acid (AA); iii) 45 ng/mL estriol (EST); and iv) 45 ng/mL cortisol (COR) in 0.1 M phosphate buffer using an MIP@PANI@CNT/CNC@textile cortisol sensor patch.

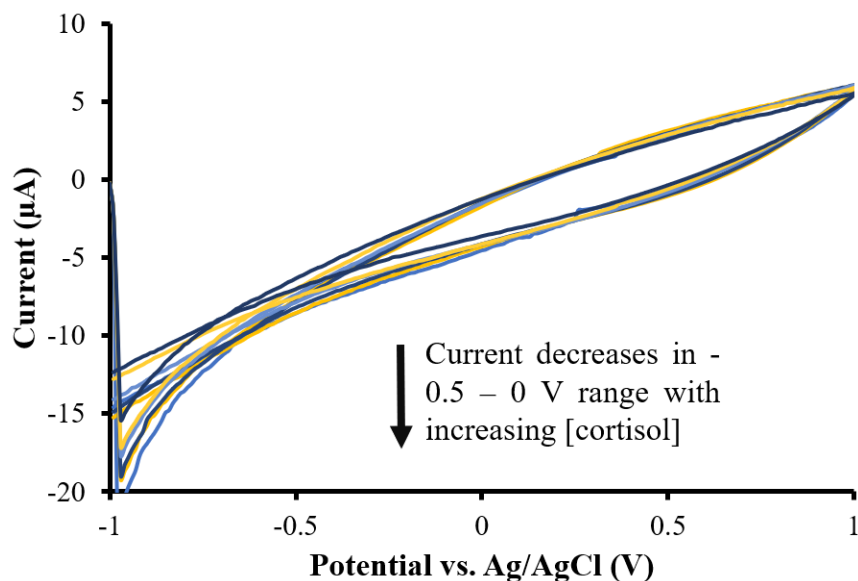

**Figure S7.** Overlaid voltammograms from the standard addition calibration for sweat sample analysis using the AuNPs@MIP@PANI@CNT/CNC@textile cortisol sensor patch.
